# Supplementary material for: A novel mitochondrial protein is required for cell wall integrity, auxin accumulation and root elongation in Arabidopsis under salt stress
Source: PubMed Central journal article supplement (PMC10441957; doi:10.1007/s44154-022-00036-3), 2022-02-08
Supplement: 44154_2022_36_MOESM1_ESM.pdf [file 44154_2022_36_MOESM1_ESM.pdf]

## Supplementary Table 1

Table S1. Primers used in this study.

| <b>Primer name</b>       | <b>Sequence</b>                                              | <b>Usage</b>                              |
|--------------------------|--------------------------------------------------------------|-------------------------------------------|
| <i>RRES1</i> RT1-P1      | TTTTTCTTCGGATTCGGCTACG                                       | semi-quantitative RT-PCR                  |
| <i>RRES1</i> RT1-P2      | AAAAGAAACGCCATTTCCAGCA                                       | semi- quantitative RT-PCR                 |
| <i>RRES1</i> RT2-P3      | AAATCTCATGCTTCCTTTGACG                                       | semi- quantitative RT-PCR                 |
| <i>RRES1</i> RT2-P4      | TTCCATGCCTCGAGCATTAAAC                                       | semi- quantitative RT-PCR                 |
| LB1.3                    | ATTTTGCCGATTTTCGGAAC                                         | Genotyping                                |
| <i>rres1-1</i> LP        | ACATTGCTTTGTTGGATGGAG                                        | Genotyping                                |
| <i>rres1-1</i> RP        | TCGAGAAGAAGACAGAGCTGC                                        | Genotyping                                |
| <i>rres1-2</i> LP        | CTGGACAAGGCTTGTCTGATC                                        | Genotyping                                |
| <i>rres1-2</i> RP        | ACCTTAGGATCCCTTCACGTG                                        | Genotyping                                |
| <i>RRES1</i> genomic-LP  | GGGGACAAGTTTGTACAAAAAAGCAGGC<br>TTCTATGTATTCGCCAACTTAGGAA    | Plasmid construction<br>Transgenic plants |
| <i>RRES1</i> genomic-RP  | GGGGACCACTTTGTACAAGAAAGCTGGG<br>TCGAAATCGTATTTAGTTCTTCCA     | Plasmid construction<br>Transgenic plants |
| <i>RRES1</i> cds-LP      | GGGGACAAGTTTGTACAAAAAAGCAGGC<br>TTCACCATGGGTTCCCGGAGAGATTATC | Plasmid construction Split-<br>LUC assay  |
| <i>RRES1</i> cds-RP      | GGGGACCACTTTGTACAAGAAAGCTGGG<br>TCGAAATCGTATTTAGTTCTTCCA     | Plasmid construction Split-<br>LUC assay  |
| <i>WAT1</i> cds-LP       | GGGGACAAGTTTGTACAAAAAAGCAGGC<br>TTCACCATGGCGGATAACACCGATAATC | Plasmid construction Split-<br>LUC assay  |
| <i>WAT1</i> cds-RP       | GGGGACCACTTTGTACAAGAAAGCTGGG<br>TCAACATTGTCCGTTGACTGATGG     | Plasmid construction Split-<br>LUC assay  |
| <i>RRES1</i> promoter-LP | GGGGACAAGTTTGTACAAAAAAGCAGGC<br>TTCTATGTATTCGCCAACTTAGGAA    | Plasmid construction GUS<br>assay         |
| <i>RRES1</i> promoter-RP | GGGGACCACTTTGTACAAGAAAGCTGGG<br>TCTAATATCGTATTTTCAACCTTC     | Plasmid construction GUS<br>assay         |
