# Supplementary material for: A novel mitochondrial protein is required for cell wall integrity, auxin accumulation and root elongation in Arabidopsis under salt stress
Source: PubMed Central journal article supplement (PMC10441957; doi:10.1007/s44154-022-00036-3), 2022-02-08

# Supplementary Figure 4

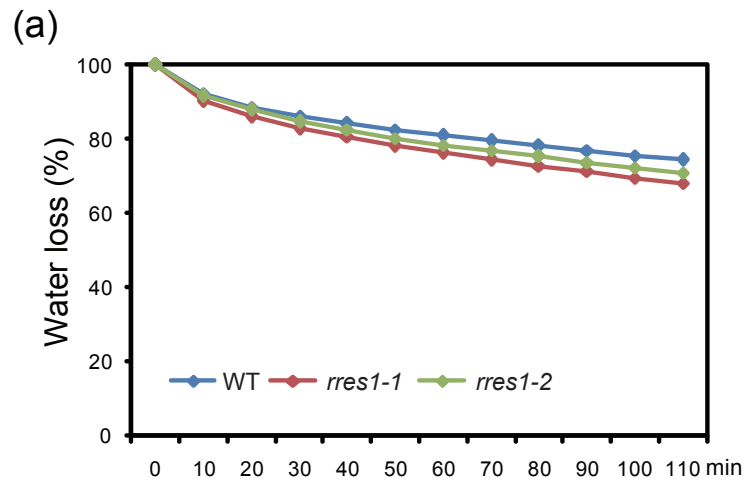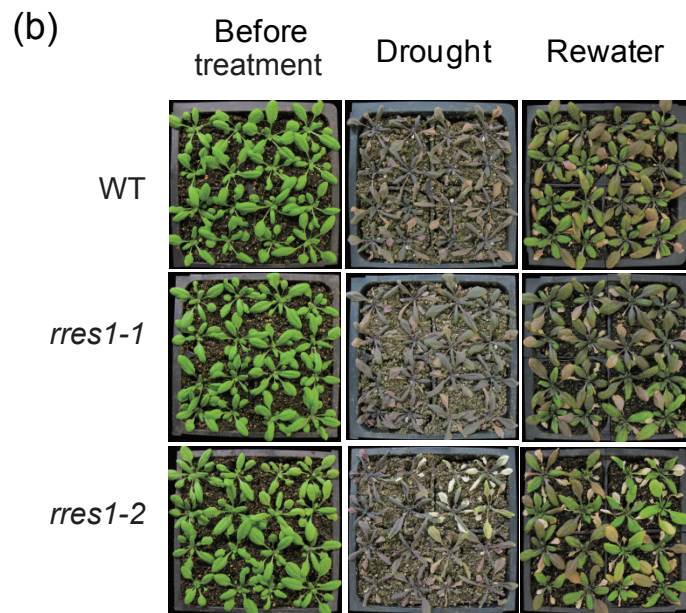

Supplement: 44154_2022_36_MOESM5_ESM.pdf [file 44154_2022_36_MOESM5_ESM.pdf]
