# Supplementary material for: A novel mitochondrial protein is required for cell wall integrity, auxin accumulation and root elongation in Arabidopsis under salt stress
Source: PubMed Central journal article supplement (PMC10441957; doi:10.1007/s44154-022-00036-3), 2022-02-08
Supplement: 44154_2022_36_MOESM7_ESM.pdf [file 44154_2022_36_MOESM7_ESM.pdf]

Supplementary Figure 6

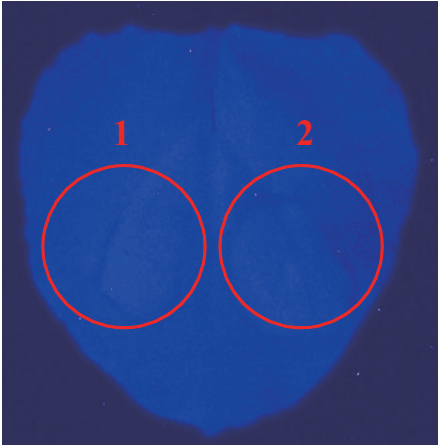

1. nLUC-WAT1+cLUC-RRES1  
2. nLUC-WAT1+cLUC-RRES1

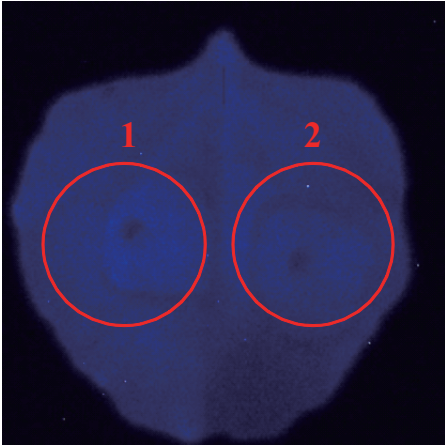

1. nLUC-RRES1+cLUC-RRES1  
2. nLUC-RRES1+cLUC-RRES1

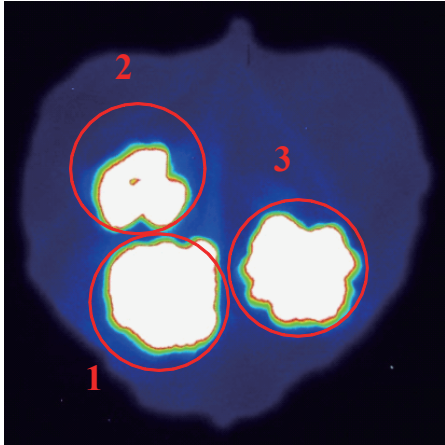

1. nLUC-WAT1+cLUC-WAT1  
2. nLUC-WAT1+cLUC-WAT1  
3. nLUC-WAT1+cLUC-WAT1
